# Supplementary material for: Keratin 19: a key role player in the invasion of human hepatocellular carcinomas
Source: HighWire-hosted journal article supplement (doi:10.1136/gutjnl-2012-304351), 2013-08-19
Supplement: gutjnl-2012-304351supp2.pdf [file gutjnl-2012-304351supp2.pdf]

## Supplementary File 2.

Out of 21,329 genes in the arrays, 132 genes correlated positively and 203 genes correlated negatively with *KRT19* expression, using a total of 139 HCC samples.

### **Genes (n=132) positively correlated to KRT19 expression:**

| Gene     | Pearson | Name                                                                                                             |
|----------|---------|------------------------------------------------------------------------------------------------------------------|
| KRT19    | 1.00    | keratin 19 (KRT19), mRNA.                                                                                        |
| CTBP2    | 0.73    | C-terminal binding protein 2 (CTBP2), transcript variant 1, mRNA.                                                |
| S100A6   | 0.73    | S100 calcium binding protein A6 (calcylin) (S100A6), mRNA.                                                       |
| PROM1    | 0.69    | prominin 1 (PROM1), mRNA.                                                                                        |
| LRRC16   | 0.69    | leucine rich repeat containing 16 (LRRC16), mRNA.                                                                |
| KIAA1363 | 0.68    | KIAA1363 protein (KIAA1363), mRNA.                                                                               |
| VASP     | 0.67    | Vasodilator-stimulated phosphoprotein                                                                            |
| C12orf14 | 0.65    | chromosome 12 open reading frame 14 (C12orf14), mRNA.                                                            |
| ANXA3    | 0.65    | annexin A3 (ANXA3), mRNA.                                                                                        |
| RAB25    | 0.65    | RAB25, member RAS oncogene family (RAB25), mRNA.                                                                 |
| CTHRC1   | 0.64    | collagen triple helix repeat containing 1 (CTHRC1), mRNA.                                                        |
| SPINT1   | 0.64    | serine protease inhibitor, Kunitz type 1 (SPINT1), transcript variant 2, mRNA.                                   |
| LAMC2    | 0.63    | laminin, gamma 2 (LAMC2), transcript variant 1, mRNA.                                                            |
| TACSTD2  | 0.63    | tumor-associated calcium signal transducer 2 (TACSTD2), mRNA.                                                    |
| CT120    | 0.63    | membrane protein expressed in epithelial-like lung adenocarcinoma (CT120), mRNA.                                 |
| COL10A1  | 0.62    | collagen, type X, alpha 1 (Schmid metaphyseal chondrodysplasia) (COL10A1), mRNA.                                 |
| S100A14  | 0.61    | S100 calcium binding protein A14 (S100A14), mRNA.                                                                |
| DDR1     | 0.61    | discoidin domain receptor family, member 1 (DDR1), transcript variant 2, mRNA.                                   |
| C20orf35 | 0.61    | chromosome 20 open reading frame 35 (C20orf35), mRNA.                                                            |
| CDK2AP1  | 0.61    | CDK2-associated protein 1 (CDK2AP1), mRNA.                                                                       |
| GRB7     | 0.60    | growth factor receptor-bound protein 7 (GRB7), mRNA.                                                             |
| GSTP1    | 0.60    | glutathione S-transferase pi (GSTP1), mRNA.                                                                      |
| HRMT1L1  | 0.60    | HMT1 hnRNP methyltransferase-like 1 ( <i>S. cerevisiae</i> ) (HRMT1L1), transcript variant 2, mRNA.              |
| VEZATIN  | 0.59    | transmembrane protein vezatin (VEZATIN), mRNA.                                                                   |
| ADAM8    | 0.59    | a disintegrin and metalloproteinase domain 8 (ADAM8), mRNA.                                                      |
| CEACAM6  | 0.59    | carcinoembryonic antigen-related cell adhesion molecule 6 (non-specific cross reacting antigen) (CEACAM6), mRNA. |
| C6orf29  | 0.59    | chromosome 6 open reading frame 29 (C6orf29), mRNA.                                                              |
| TRIP10   | 0.59    | thyroid hormone receptor interactor 10 (TRIP10), mRNA.                                                           |
| C6orf83  | 0.59    | chromosome 6 open reading frame 83 (C6orf83), mRNA.                                                              |
| RMSA1    | 0.59    | Regulator of mitotic spindle assembly 1                                                                          |
| SPINT2   | 0.58    | serine protease inhibitor, Kunitz type, 2 (SPINT2), mRNA.                                                        |
| SLC9A2   | 0.58    | solute carrier family 9 (sodium/hydrogen exchanger), isoform 2 (SLC9A2), mRNA.                                   |
| ITPR3    | 0.58    | inositol 1,4,5-triphosphate receptor, type 3 (ITPR3), mRNA.                                                      |
| PRKCD    | 0.58    | protein kinase C, delta (PRKCD), transcript variant 2, mRNA.                                                     |
| TM4SF1   | 0.58    | Transmembrane 4 superfamily member 1                                                                             |
| HK1      | 0.58    | hexokinase 1 (HK1), nuclear gene encoding mitochondrial protein, transcript variant 1, mRNA.                     |
| MAPK13   | 0.58    | mitogen-activated protein kinase 13 (MAPK13), mRNA.                                                              |
| GALNT7   | 0.58    | UDP-N-acetyl-alpha-D-galactosamine:polypeptide N-acetylgalactosaminyltransferase 7 (GalNAc-T7) (GALNT7), mRNA.   |
| LAMB1    | 0.58    | laminin, beta 1 (LAMB1), mRNA.                                                                                   |
| IQGAP1   | 0.58    | IQ motif containing GTPase activating protein 1 (IQGAP1), mRNA.                                                  |
| SULF2    | 0.57    | sulfatase 2 (SULF2), transcript variant 2, mRNA.                                                                 |
| ISYNA1   | 0.57    | myo-inositol 1-phosphate synthase A1 (ISYNA1), mRNA.                                                             |
| SEMA3C   | 0.57    | sema domain, immunoglobulin domain (Ig), short basic domain, secreted, (semaphorin) 3C                           |

|           |      |                                                                                                                                                                                                                                        |
|-----------|------|----------------------------------------------------------------------------------------------------------------------------------------------------------------------------------------------------------------------------------------|
|           |      | (SEMA3C), mRNA.                                                                                                                                                                                                                        |
| CSDA      | 0.57 | cold shock domain protein A (CSDA), mRNA.                                                                                                                                                                                              |
| ITIH5     | 0.57 | inter-alpha (globulin) inhibitor H5 (ITIH5), transcript variant 2, mRNA.                                                                                                                                                               |
| RBMS1     | 0.57 | RNA binding motif, single stranded interacting protein 1                                                                                                                                                                               |
| RBMS1     | 0.57 | RNA binding motif, single stranded interacting protein 1 (RBMS1), transcript variant 3, mRNA.                                                                                                                                          |
| PLSCR1    | 0.57 | phospholipid scramblase 1 (PLSCR1), mRNA.                                                                                                                                                                                              |
| LOC91461  | 0.57 | PREDICTED: Homo sapiens hypothetical protein BC007901 (LOC91461), mRNA.                                                                                                                                                                |
| RAB27B    | 0.57 | RAB27B, member RAS oncogene family                                                                                                                                                                                                     |
| KLF5      | 0.56 | Kruppel-like factor 5 (intestinal) (KLF5), mRNA.                                                                                                                                                                                       |
| FXYD3     | 0.56 | FXYD domain containing ion transport regulator 3 (FXYD3), transcript variant 1, mRNA.                                                                                                                                                  |
| VCL       | 0.56 | vinculin (VCL), transcript variant 2, mRNA.                                                                                                                                                                                            |
| NFE2L3    | 0.56 | nuclear factor (erythroid-derived 2)-like 3 (NFE2L3), mRNA.<br>phosphodiesterase 4A, cAMP-specific (phosphodiesterase E2 dunce homolog, Drosophila) (PDE4A), mRNA.                                                                     |
| PDE4A     | 0.56 |                                                                                                                                                                                                                                        |
| AREG      | 0.56 | amphiregulin (schwannoma-derived growth factor) (AREG), mRNA.                                                                                                                                                                          |
| HUMPPA    | 0.56 | Paraneoplastic antigen                                                                                                                                                                                                                 |
| HOP       | 0.56 | homeodomain-only protein (HOP), transcript variant 2, mRNA.                                                                                                                                                                            |
| TRIM29    | 0.56 | tripartite motif-containing 29 (TRIM29), transcript variant 2, mRNA.                                                                                                                                                                   |
| KIAA0540  | 0.55 | PREDICTED: Homo sapiens KIAA0540 protein (KIAA0540), mRNA.                                                                                                                                                                             |
| LOC253981 | 0.55 | Hypothetical protein LOC253981                                                                                                                                                                                                         |
| ELF4      | 0.55 | E74-like factor 4 (ets domain transcription factor) (ELF4), mRNA.                                                                                                                                                                      |
| F3        | 0.55 | coagulation factor III (thromboplastin, tissue factor) (F3), mRNA.                                                                                                                                                                     |
| TM4SF1    | 0.55 | transmembrane 4 superfamily member 1 (TM4SF1), mRNA.                                                                                                                                                                                   |
| D2S448    | 0.55 | PREDICTED: Homo sapiens Melanoma associated gene (D2S448), mRNA.                                                                                                                                                                       |
| TNFRSF21  | 0.55 | tumor necrosis factor receptor superfamily, member 21 (TNFRSF21), mRNA.                                                                                                                                                                |
| ADD3      | 0.55 | adducin 3 (gamma) (ADD3), transcript variant 2, mRNA.                                                                                                                                                                                  |
| NEDD5     | 0.54 | neural precursor cell expressed, developmentally down-regulated 5 (NEDD5), mRNA.<br>solute carrier family 9 (sodium/hydrogen exchanger), isoform 1 (antiporter, Na <sup>+</sup> /H <sup>+</sup> , amiloride sensitive) (SLC9A1), mRNA. |
| SLC9A1    | 0.54 |                                                                                                                                                                                                                                        |
| KIAA1411  | 0.54 | PREDICTED: Homo sapiens KIAA1411 (KIAA1411), mRNA.                                                                                                                                                                                     |
| C20orf103 | 0.54 | chromosome 20 open reading frame 103 (C20orf103), mRNA.                                                                                                                                                                                |
| TEAD4     | 0.54 | TEA domain family member 4 (TEAD4), transcript variant 3, mRNA.                                                                                                                                                                        |
| TUBB6     | 0.54 | tubulin beta MGC4083 (MGC4083), mRNA.                                                                                                                                                                                                  |
| LOC146439 | 0.54 | PREDICTED: Homo sapiens hypothetical LOC146439 (LOC146439), mRNA.<br>solute carrier family 25 (mitochondrial carrier; adenine nucleotide translocator), member 6 (SLC25A6), mRNA.                                                      |
| SLC25A6   | 0.54 |                                                                                                                                                                                                                                        |
| MTHFD2    | 0.54 | methylene tetrahydrofolate dehydrogenase (NAD <sup>+</sup> dependent), methenyltetrahydrofolate cyclohydrolase (MTHFD2), mRNA.                                                                                                         |
| TMSB10    | 0.54 | thymosin, beta 10 (TMSB10), mRNA.                                                                                                                                                                                                      |
| S100A14   | 0.53 | S100 calcium binding protein A14 (calgizzarin)                                                                                                                                                                                         |
| RGS2      | 0.53 | regulator of G-protein signalling 2, 24kDa (RGS2), mRNA.                                                                                                                                                                               |
| C7orf23   | 0.53 | chromosome 7 open reading frame 23 (C7orf23), mRNA.<br>integrin, alpha 3 (antigen CD49C, alpha 3 subunit of VLA-3 receptor) (ITGA3), transcript variant b, mRNA.                                                                       |
| ITGA3     | 0.53 |                                                                                                                                                                                                                                        |
| KRT7      | 0.53 | keratin 7 (KRT7), mRNA.                                                                                                                                                                                                                |
| PKM2      | 0.53 | pyruvate kinase, muscle (PKM2), transcript variant 1, mRNA.                                                                                                                                                                            |
| SLC6A14   | 0.53 | solute carrier family 6 (neurotransmitter transporter), member 14 (SLC6A14), mRNA.                                                                                                                                                     |
| MDFI      | 0.53 | MyoD family inhibitor (MDFI), mRNA.                                                                                                                                                                                                    |
| AGRN      | 0.53 | PREDICTED: Homo sapiens agrin (AGRN), mRNA.                                                                                                                                                                                            |
| ARHGAP18  | 0.53 | Rho GTPase activating protein 18 (ARHGAP18), mRNA.                                                                                                                                                                                     |
| TSC       | 0.53 | hypothetical protein FLJ20607 (TSC), mRNA.                                                                                                                                                                                             |
| PLEKHB1   | 0.53 | pleckstrin homology domain containing, family B (evectins) member 1 (PLEKHB1), mRNA.                                                                                                                                                   |
| HES4      | 0.53 | hairy and enhancer of split 4 (Drosophila) (HES4), mRNA.                                                                                                                                                                               |
| MAPRE1    | 0.53 | microtubule-associated protein, RP/EB family, member 1 (MAPRE1), mRNA.                                                                                                                                                                 |
| C15orf22  | 0.52 | chromosome 15 open reading frame 22 (C15orf22), mRNA.                                                                                                                                                                                  |
| JAG1      | 0.52 | jagged 1 (Alagille syndrome) (JAG1), mRNA.                                                                                                                                                                                             |

|           |      |                                                                                                                           |
|-----------|------|---------------------------------------------------------------------------------------------------------------------------|
| DSC2      | 0.52 | desmocollin 2 (DSC2), transcript variant Dsc2a, mRNA.                                                                     |
| HDAC7A    | 0.52 | histone deacetylase 7A (HDAC7A), transcript variant 2, mRNA.                                                              |
| HMGA2     | 0.52 | high mobility group AT-hook 2 (HMGA2), mRNA.                                                                              |
| FGD6      | 0.52 | FYVE, RhoGEF and PH domain containing 6                                                                                   |
| KRT17     | 0.52 | keratin 17 (KRT17), mRNA.                                                                                                 |
| LTBP1     | 0.52 | latent transforming growth factor beta binding protein 1 (LTBP1), transcript variant 2, mRNA.                             |
| FLJ20171  | 0.52 | hypothetical protein FLJ20171 (FLJ20171), mRNA.                                                                           |
| SERPINH1  | 0.52 | serine (or cysteine) proteinase inhibitor, clade H (heat shock protein 47), member 1, (collagen binding protein 1), mRNA. |
| MGC11242  | 0.52 | hypothetical protein MGC11242 (MGC11242), mRNA.                                                                           |
| NCK2      | 0.52 | NCK adaptor protein 2                                                                                                     |
| SEPW1     | 0.52 | selenoprotein W, 1 (SEPW1), mRNA.                                                                                         |
| MC3R      | 0.52 | melanocortin 3 receptor (MC3R), mRNA.                                                                                     |
| MAL2      | 0.52 | mal, T-cell differentiation protein 2 (MAL2), mRNA.                                                                       |
| CDCP1     | 0.52 | CUB domain-containing protein 1 (CDCP1), transcript variant 1, mRNA.                                                      |
| SLC4A7    | 0.51 | solute carrier family 4, sodium bicarbonate cotransporter, member 7 (SLC4A7), mRNA.                                       |
| GPR56     | 0.51 | G protein-coupled receptor 56 (GPR56), transcript variant 3, mRNA.                                                        |
| CRIP1     | 0.51 | cysteine-rich protein 1 (intestinal) (CRIP1), mRNA.                                                                       |
| ZNF267    | 0.51 | zinc finger protein 267 (ZNF267), transcript variant 498723, mRNA.                                                        |
| AGR2      | 0.51 | anterior gradient 2 homolog ( <i>Xenopus laevis</i> ) (AGR2), mRNA.                                                       |
| TD-60     | 0.51 | RCC1-like (TD-60), mRNA.                                                                                                  |
| SARG      | 0.51 | Specifically androgen-regulated protein                                                                                   |
| LOC387882 | 0.51 | hypothetical protein (LOC387882), mRNA.                                                                                   |
| CLIC1     | 0.51 | chloride intracellular channel 1 (CLIC1), mRNA.                                                                           |
| TM4SF14   | 0.51 | tetraspanin similar to TM4SF9 (DC-TM4F2), mRNA.                                                                           |
| MYO10     | 0.51 | myosin X (MYO10), mRNA.                                                                                                   |
| ITGB6     | 0.51 | integrin, beta 6 (ITGB6), mRNA.                                                                                           |
| SPHK1     | 0.51 | sphingosine kinase 1 (SPHK1), mRNA.                                                                                       |
| LOC144501 | 0.51 | hypothetical protein LOC144501 (LOC144501), mRNA.                                                                         |
| DYRK2     | 0.51 | dual-specificity tyrosine-(Y)-phosphorylation regulated kinase 2 (DYRK2), transcript variant 1, mRNA.                     |
| FLJ10901  | 0.51 | hypothetical protein FLJ10901 (FLJ10901), mRNA.                                                                           |
| OSBPL10   | 0.51 | oxysterol binding protein-like 10 (OSBPL10), mRNA.                                                                        |
| CGI-62    | 0.51 | CGI-62 protein (CGI-62), mRNA.                                                                                            |
| MARVELD1  | 0.50 | MARVEL domain containing 1 (MARVELD1), mRNA.                                                                              |
| CSNK1E    | 0.50 | casein kinase 1, epsilon (CSNK1E), transcript variant 2, mRNA.                                                            |
| LHFPL2    | 0.50 | lipoma HMGIC fusion partner-like 2 (LHFPL2), mRNA.                                                                        |
| ANXA1     | 0.50 | annexin A1 (ANXA1), mRNA.                                                                                                 |
| TAX1BP3   | 0.50 | Tax1 (human T-cell leukemia virus type I) binding protein 3 (TAX1BP3), mRNA.                                              |
| CSNK1G2   | 0.50 | casein kinase 1, gamma 2 (CSNK1G2), mRNA.                                                                                 |
| LMCD1     | 0.50 | LIM and cysteine-rich domains 1 (LMCD1), mRNA.                                                                            |

**Genes (n=203) negatively correlated to KRT19 expression:**

| Gene     | Pearson | Name                                                                                                              |
|----------|---------|-------------------------------------------------------------------------------------------------------------------|
| ABAT     | -0.50   | 4-aminobutyrate aminotransferase (ABAT), nuclear gene encoding mitochondrial protein, transcript variant 2, mRNA. |
| F12      | -0.50   | coagulation factor XII (Hageman factor) (F12), mRNA.                                                              |
| FLJ20581 | -0.50   | hypothetical protein FLJ20581 (FLJ20581), mRNA.                                                                   |
| FLCN     | -0.50   | folliculin (FLCN), transcript variant 1, mRNA.                                                                    |
| ABCC6    | -0.50   | ATP-binding cassette, sub-family C (CFTR/MRP), member 6 (ABCC6), mRNA.                                            |
| ACOX1    | -0.50   | acyl-Coenzyme A oxidase 1, palmitoyl (ACOX1), transcript variant 1, mRNA.                                         |
| PON3     | -0.50   | Paraoxonase 3                                                                                                     |

|           |       |                                                                                                                               |
|-----------|-------|-------------------------------------------------------------------------------------------------------------------------------|
| NR112     | -0.50 | nuclear receptor subfamily 1, group 1, member 2 (NR112), transcript variant 2, mRNA.                                          |
| SLC25A20  | -0.50 | solute carrier family 25 (carnitine/acylcarnitine translocase), member 20, nuclear gene encoding mitochondrial protein, mRNA. |
| KLKB1     | -0.50 | kallikrein B, plasma (Fletcher factor) 1 (KLKB1), mRNA.                                                                       |
| APOE      | -0.50 | apolipoprotein E (APOE), mRNA.                                                                                                |
| C6        | -0.50 | complement component 6 (C6), mRNA.                                                                                            |
| CYP3A43   | -0.50 | cytochrome P450, family 3, subfamily A, polypeptide 43 (CYP3A43), transcript variant 3, mRNA.                                 |
| RRH       | -0.50 | retinal pigment epithelium-derived rhodopsin homolog (RRH), mRNA.                                                             |
| AMBP      | -0.51 | alpha-1-microglobulin/bikunin precursor (AMBP), mRNA.                                                                         |
| CABC1     | -0.51 | chaperone, ABC1 activity of bc1 complex like ( <i>S. pombe</i> ) (CABC1), mRNA.                                               |
| APCS      | -0.51 | amyloid P component, serum (APCS), mRNA.                                                                                      |
| SELENBP1  | -0.51 | Selenium binding protein 1                                                                                                    |
| ANAPC2    | -0.51 | anaphase promoting complex subunit 2 (ANAPC2), mRNA.                                                                          |
| GGCX      | -0.51 | gamma-glutamyl carboxylase (GGCX), mRNA.                                                                                      |
| SLC27A5   | -0.51 | solute carrier family 27 (fatty acid transporter), member 5 (SLC27A5), mRNA.                                                  |
| FLJ20054  | -0.51 | Family with sequence similarity 31, member B                                                                                  |
| HNF4A     | -0.51 | hepatocyte nuclear factor 4, alpha (HNF4A), transcript variant 2, mRNA.                                                       |
| HADHSC    | -0.51 | L-3-hydroxyacyl-Coenzyme A dehydrogenase, short chain (HADHSC), mRNA.                                                         |
| LEAP-2    | -0.51 | liver-expressed antimicrobial peptide 2 (LEAP-2), mRNA.                                                                       |
| DHCR24    | -0.51 | 24-dehydrocholesterol reductase (DHCR24), mRNA.                                                                               |
| ECHS1     | -0.51 | enoyl Coenzyme A hydratase, short chain, 1, mitochondrial (ECHS1), nuclear gene encoding mitochondrial protein, mRNA.         |
| ACMSD     | -0.51 | aminocarboxymuconate semialdehyde decarboxylase (ACMSD), mRNA.                                                                |
| OGDHL     | -0.51 | oxoglutarate dehydrogenase-like (OGDHL), mRNA.                                                                                |
| CBR1      | -0.51 | carbonyl reductase 1 (CBR1), mRNA.                                                                                            |
| SLC35D1   | -0.51 | Solute carrier family 35 (UDP-glucuronic acid/UDP-N-acetylgalactosamine dual transporter), member D1                          |
| WDR23     | -0.51 | WD repeat domain 23 (WDR23), transcript variant 2, mRNA.                                                                      |
| GJB1      | -0.51 | Gap junction protein, beta 1, 32kDa (connexin 32, Charcot-Marie-Tooth neuropathy, X-linked)                                   |
| ALDH1A1   | -0.51 | aldehyde dehydrogenase 1 family, member A1 (ALDH1A1), mRNA.                                                                   |
| SLC31A1   | -0.51 | solute carrier family 31 (copper transporters), member 1 (SLC31A1), mRNA.                                                     |
| MTCBP-1   | -0.51 | membrane-type 1 matrix metalloproteinase cytoplasmic tail binding protein-1 (MTCBP-1), mRNA.                                  |
| PLA2G12B  | -0.52 | phospholipase A2, group XIIB (PLA2G12B), mRNA.                                                                                |
| LOC339263 | -0.52 | PREDICTED: Homo sapiens hypothetical protein LOC339263 (LOC339263), mRNA.                                                     |
| SFXN5     | -0.52 | sideroflexin 5 (SFXN5), mRNA.                                                                                                 |
| SNX15     | -0.52 | sorting nexin 15 (SNX15), transcript variant B, mRNA.                                                                         |
| PHYH      | -0.52 | phytanoyl-CoA hydroxylase (Refsum disease) (PHYH), mRNA.                                                                      |
| PDCD8     | -0.52 | programmed cell death 8 (apoptosis-inducing factor), nuclear gene encoding mitochondrial protein, transcript variant 3, mRNA. |
| SDC1      | -0.52 | syndecan 1 (SDC1), mRNA.                                                                                                      |
| APOC2     | -0.52 | apolipoprotein C-II (APOC2), mRNA.                                                                                            |
| HRG       | -0.52 | histidine-rich glycoprotein (HRG), mRNA.                                                                                      |
| MGC15937  | -0.52 | similar to RIKEN cDNA 0610008P16 gene (MGC15937), mRNA.                                                                       |
| GGH       | -0.52 | gamma-glutamyl hydrolase (conjugase, folic polyglutamate hydrolase) (GGH), mRNA.                                              |
| AGXT      | -0.52 | Alanine-glyoxylate aminotransferase (oxalosis I; hyperoxaluria I; glycolic aciduria; serine-pyruvate aminotransferase)        |
| MAP4K1    | -0.52 | mitogen-activated protein kinase kinase kinase kinase 1 (MAP4K1), mRNA.                                                       |
| AKR1C1    | -0.52 | aldo-keto reductase family 1, member C1 (dihydrodiol dehydrogenase (DH) 1; 20-alpha (3-alpha)-hydroxysteroid DH), mRNA.       |
| DMGDH     | -0.52 | dimethylglycine dehydrogenase (DMGDH), nuclear gene encoding mitochondrial protein, mRNA.                                     |
| H6PD      | -0.52 | Hexose-6-phosphate dehydrogenase (glucose 1-dehydrogenase)                                                                    |
| DECR2     | -0.52 | 2,4-dienoyl CoA reductase 2, peroxisomal (DECR2), mRNA.                                                                       |
| SYVN1     | -0.52 | synovial apoptosis inhibitor 1, synoviolin (SYVN1), transcript variant 1, mRNA.                                               |
| ATF3      | -0.52 | activating transcription factor 3 (ATF3), mRNA.                                                                               |
| PDXP      | -0.52 | pyridoxal (pyridoxine, vitamin B6) phosphatase (PDXP), mRNA.                                                                  |

|           |       |                                                                                                                              |
|-----------|-------|------------------------------------------------------------------------------------------------------------------------------|
| SERPING1  | -0.52 | serine (or cysteine) proteinase inhibitor, clade G (C1 inhibitor), member 1, (angioedema, hereditary) (SERPING1), mRNA.      |
| SEPX1     | -0.52 | selenoprotein X, 1 (SEPX1), mRNA.                                                                                            |
| SIAH2     | -0.52 | seven in absentia homolog 2 (Drosophila) (SIAH2), mRNA.                                                                      |
| RODH      | -0.52 | 3-hydroxysteroid epimerase                                                                                                   |
| DHRS3     | -0.52 | dehydrogenase/reductase (SDR family) member 3 (DHRS3), mRNA.                                                                 |
| ACOX2     | -0.52 | acyl-Coenzyme A oxidase 2, branched chain (ACOX2), mRNA.                                                                     |
| AGT       | -0.52 | angiotensinogen (serine (or cysteine) proteinase inhibitor, clade A (alpha-1 antiproteinase, antitrypsin), member 8), mRNA.  |
| LPA       | -0.52 | lipoprotein, Lp(a) (LPA), mRNA.                                                                                              |
| DCXR      | -0.53 | dicarbonyl/L-xylulose reductase (DCXR), mRNA.                                                                                |
| ACSL1     | -0.53 | Acyl-CoA synthetase long-chain family member 1                                                                               |
| SLC27A2   | -0.53 | solute carrier family 27 (fatty acid transporter), member 2 (SLC27A2), mRNA.                                                 |
| C5        | -0.53 | complement component 5 (C5), mRNA.                                                                                           |
| HSDL2     | -0.53 | chromosome 9 open reading frame 99 (C9orf99), mRNA.                                                                          |
| CFHL3     | -0.53 | complement factor H-related 3 (CFHL3), mRNA.                                                                                 |
| SLC38A4   | -0.53 | solute carrier family 38, member 4 (SLC38A4), mRNA.                                                                          |
| CCR4      | -0.53 | Chemokine (C-C motif) receptor 4                                                                                             |
| GATM      | -0.53 | glycine amidinotransferase (L-arginine:glycine amidinotransferase) (GATM), mRNA.                                             |
| TCEA3     | -0.53 | transcription elongation factor A (SII), 3 (TCEA3), mRNA.                                                                    |
| F5        | -0.53 | coagulation factor V (proaccelerin, labile factor) (F5), mRNA.                                                               |
| ABCB4     | -0.53 | ATP-binding cassette, sub-family B (MDR/TAP), member 4 (ABCB4), transcript variant B, mRNA.                                  |
| AQP9      | -0.53 | aquaporin 9 (AQP9), mRNA.                                                                                                    |
| ALDOB     | -0.53 | aldolase B, fructose-bisphosphate (ALDOB), mRNA.                                                                             |
| SEC22L3   | -0.53 | SEC22 vesicle trafficking protein-like 3 (S. cerevisiae) (SEC22L3), transcript variant 2, mRNA.                              |
| CYP4F2    | -0.53 | cytochrome P450, family 4, subfamily F, polypeptide 2 (CYP4F2), mRNA.                                                        |
| IF        | -0.53 | I factor (complement) (IF), mRNA.                                                                                            |
| SERPINF1  | -0.53 | serine (or cysteine) proteinase inhibitor, clade F (alpha-2 antiplasmin, pigment epithelium derived factor), member 1, mRNA. |
| FLJ14146  | -0.53 | hypothetical protein FLJ14146 (FLJ14146), mRNA.                                                                              |
| FMO3      | -0.54 | flavin containing monooxygenase 3 (FMO3), transcript variant 1, mRNA.                                                        |
| CRYM      | -0.54 | crystallin, mu (CRYM), mRNA.                                                                                                 |
| POR       | -0.54 | P450 (cytochrome) oxidoreductase (POR), mRNA.                                                                                |
| WBSCR14   | -0.54 | Williams Beuren syndrome chromosome region 14 (WBSCR14), transcript variant 5, mRNA.                                         |
| GLRA3     | -0.54 | glycine receptor, alpha 3 (GLRA3), mRNA.                                                                                     |
| C1QTNF4   | -0.54 | C1q and tumor necrosis factor related protein 4 (C1QTNF4), mRNA.                                                             |
| PAH       | -0.54 | phenylalanine hydroxylase (PAH), mRNA.                                                                                       |
| C6orf80   | -0.54 | chromosome 6 open reading frame 80 (C6orf80), mRNA.                                                                          |
| SOD1      | -0.54 | superoxide dismutase 1, soluble (amyotrophic lateral sclerosis 1 (adult)) (SOD1), mRNA.                                      |
| ABCG8     | -0.54 | ATP-binding cassette, sub-family G (WHITE), member 8 (sterolin 2) (ABCG8), mRNA.                                             |
| C1S       | -0.54 | complement component 1, s subcomponent (C1S), transcript variant 1, mRNA.                                                    |
| HSD11B1   | -0.54 | hydroxysteroid (11-beta) dehydrogenase 1 (HSD11B1), transcript variant 1, mRNA.                                              |
| ABCG5     | -0.54 | ATP-binding cassette, sub-family G (WHITE), member 5 (sterolin 1) (ABCG5), mRNA.                                             |
| CHPT1     | -0.54 | choline phosphotransferase 1 (CHPT1), mRNA.                                                                                  |
| FLJ20699  | -0.54 | hypothetical protein FLJ20699 (FLJ20699), mRNA.                                                                              |
| PEX19     | -0.54 | peroxisomal biogenesis factor 19 (PEX19), mRNA.                                                                              |
| LOC150383 | -0.54 | Similar to RIKEN cDNA 2210021J22                                                                                             |
| PC        | -0.54 | pyruvate carboxylase (PC), nuclear gene encoding mitochondrial protein, transcript variant 2, mRNA.                          |
| ARG1      | -0.54 | arginase, liver (ARG1), mRNA.                                                                                                |
| CRYL1     | -0.54 | crystallin, lambda 1 (CRYL1), mRNA.                                                                                          |
| LOC123876 | -0.55 | PREDICTED: Homo sapiens hypothetical protein LOC123876 (LOC123876), mRNA.                                                    |
| GPX3      | -0.55 | glutathione peroxidase 3 (plasma) (GPX3), mRNA.                                                                              |
| RXRA      | -0.55 | retinoid X receptor, alpha (RXRA), mRNA.                                                                                     |
| C6orf60   | -0.55 | Chromosome 6 open reading frame 60                                                                                           |

|           |       |                                                                                                                                            |
|-----------|-------|--------------------------------------------------------------------------------------------------------------------------------------------|
| SLC38A3   | -0.55 | solute carrier family 38, member 3 (SLC38A3), mRNA.                                                                                        |
| ABCB1     | -0.55 | ATP-binding cassette, sub-family B (MDR/TAP), member 1 (ABCB1), mRNA.                                                                      |
| ARMC7     | -0.55 | armadillo repeat containing 7 (ARMC7), mRNA.                                                                                               |
| CYP27A1   | -0.55 | cytochrome P450, family 27, subfamily A, polypeptide 1 (CYP27A1), nuclear gene encoding mitochondrial protein, mRNA.                       |
| UGT1A1    | -0.55 | UDP glycosyltransferase 1 family, polypeptide A1 (UGT1A1), mRNA.                                                                           |
| VTN       | -0.55 | vitronectin (serum spreading factor, somatomedin B, complement S-protein) (VTN), mRNA.                                                     |
| HYAL1     | -0.55 | hyaluronoglucosaminidase 1 (HYAL1), transcript variant 6, mRNA.                                                                            |
| IL6R      | -0.55 | interleukin 6 receptor (IL6R), transcript variant 2, mRNA.                                                                                 |
| BTD       | -0.56 | biotinidase (BTD), mRNA.                                                                                                                   |
| CES3      | -0.56 | Carboxylesterase 3 (brain)                                                                                                                 |
| MAOA      | -0.56 | monoamine oxidase A (MAOA), nuclear gene encoding mitochondrial protein, mRNA.                                                             |
| CES2      | -0.56 | carboxylesterase 2 (intestine, liver) (CES2), transcript variant 1, mRNA.                                                                  |
| COQ6      | -0.56 | Coenzyme Q6 homolog (yeast)                                                                                                                |
| PKLR      | -0.56 | pyruvate kinase, liver and RBC (PKLR), nuclear gene encoding mitochondrial protein, transcript variant 2, mRNA.                            |
| FAM20A    | -0.56 | family with sequence similarity 20, member A (FAM20A), mRNA.                                                                               |
| AKR1C4    | -0.56 | aldo-keto reductase family 1, member C4 (chlordecone reductase; 3-alpha hydroxysteroid dehydrogenase (DH), type I; dihydrodiol DH4), mRNA. |
| TIP120B   | -0.56 | PREDICTED: Homo sapiens TBP-interacting protein (TIP120B), mRNA.                                                                           |
| MUT       | -0.56 | methylmalonyl Coenzyme A mutase (MUT), nuclear gene encoding mitochondrial protein, mRNA.                                                  |
| PMVK      | -0.56 | phosphomevalonate kinase (PMVK), mRNA.                                                                                                     |
| FLJ22578  | -0.56 | hypothetical protein FLJ22578 (FLJ22578), mRNA.                                                                                            |
| SLC30A1   | -0.56 | Solute carrier family 30 (zinc transporter), member 1                                                                                      |
| ITIH4     | -0.56 | inter-alpha (globulin) inhibitor H4 (plasma Kallikrein-sensitive glycoprotein) (ITIH4), mRNA.                                              |
| IL3       | -0.56 | interleukin 3 (colony-stimulating factor, multiple) (IL3), mRNA.                                                                           |
| GAMT      | -0.57 | guanidinoacetate N-methyltransferase (GAMT), transcript variant 1, mRNA.                                                                   |
| PLG       | -0.57 | plasminogen (PLG), mRNA.                                                                                                                   |
| CES1      | -0.57 | carboxylesterase 1 (monocyte/macrophage serine esterase 1) (CES1), mRNA.                                                                   |
| RARRES2   | -0.57 | retinoic acid receptor responder (tazarotene induced) 2 (RARRES2), mRNA.                                                                   |
| CRAT      | -0.57 | carnitine acetyltransferase (CRAT), transcript variant 3, mRNA.                                                                            |
| F2        | -0.57 | coagulation factor II (thrombin) (F2), mRNA.                                                                                               |
| AZGP1     | -0.57 | alpha-2-glycoprotein 1, zinc (AZGP1), mRNA.                                                                                                |
| CYP2D6    | -0.57 | Cytochrome P450, family 2, subfamily D, polypeptide 6                                                                                      |
| ASGR1     | -0.57 | asialoglycoprotein receptor 1 (ASGR1), mRNA.                                                                                               |
| DPYS      | -0.57 | dihydropyrimidinase (DPYS), mRNA.                                                                                                          |
| ITIH3     | -0.57 | inter-alpha (globulin) inhibitor H3 (ITIH3), mRNA.                                                                                         |
| OTC       | -0.57 | Ornithine carbamoyltransferase                                                                                                             |
| HAO1      | -0.57 | hydroxyacid oxidase (glycolate oxidase) 1 (HAO1), mRNA.                                                                                    |
| CGREF1    | -0.57 | Cell growth regulator with EF hand domain 1                                                                                                |
| FAH       | -0.57 | fumarylacetoacetate hydrolase (fumarylacetoacetase) (FAH), mRNA.                                                                           |
| CGI-49    | -0.57 | CGI-49 protein (CGI-49), mRNA.                                                                                                             |
| HGD       | -0.58 | homogentisate 1,2-dioxygenase (homogentisate oxidase) (HGD), mRNA.                                                                         |
| PPARA     | -0.58 | peroxisome proliferative activated receptor, alpha (PPARA), transcript variant 3, mRNA.                                                    |
| HCA112    | -0.58 | hepatocellular carcinoma-associated antigen 112 (HCA112), mRNA.                                                                            |
| LOC162427 | -0.58 | hypothetical protein LOC162427 (LOC162427), mRNA.                                                                                          |
| ENTPD5    | -0.58 | ectonucleoside triphosphate diphosphohydrolase 5 (ENTPD5), mRNA.                                                                           |
| ITIH1     | -0.58 | inter-alpha (globulin) inhibitor H1 (ITIH1), mRNA.                                                                                         |
| PROS1     | -0.58 | protein S (alpha) (PROS1), mRNA.                                                                                                           |
| PGRMC1    | -0.58 | progesterone receptor membrane component 1 (PGRMC1), mRNA.                                                                                 |
| HMGCS2    | -0.59 | 3-hydroxy-3-methylglutaryl-Coenzyme A synthase 2 (mitochondrial) (HMGCS2), mRNA.                                                           |
| KHK       | -0.59 | ketohexokinase (fructokinase) (KHK), transcript variant a, mRNA.                                                                           |
| BHMT2     | -0.59 | betaine-homocysteine methyltransferase 2 (BHMT2), mRNA.                                                                                    |
| GC        | -0.59 | Group-specific component (vitamin D binding protein)                                                                                       |
| TFR2      | -0.59 | transferrin receptor 2 (TFR2), mRNA.                                                                                                       |

|             |       |                                                                                                                                                                        |
|-------------|-------|------------------------------------------------------------------------------------------------------------------------------------------------------------------------|
| CDO1        | -0.59 | cysteine dioxygenase, type I (CDO1), mRNA.                                                                                                                             |
| HAGH        | -0.59 | hydroxyacylglutathione hydrolase (HAGH), mRNA.                                                                                                                         |
| BAAT        | -0.59 | bile acid Coenzyme A: amino acid N-acyltransferase (glycine N-choloyltransferase) (BAAT), mRNA.                                                                        |
| LASS2       | -0.59 | LAG1 longevity assurance homolog 2 ( <i>S. cerevisiae</i> ) (LASS2), transcript variant 3, mRNA.                                                                       |
| RGN         | -0.59 | regucalcin (senescence marker protein-30) (RGN), transcript variant 2, mRNA.                                                                                           |
| ABCC2       | -0.59 | ATP-binding cassette, sub-family C (CFTR/MRP), member 2 (ABCC2), mRNA.                                                                                                 |
| DEFB126     | -0.60 | defensin, beta 126 (DEFB126), mRNA.                                                                                                                                    |
| APOC3       | -0.60 | apolipoprotein C-III (APOC3), mRNA.                                                                                                                                    |
| NS5ATP13TP2 | -0.60 | NS5ATP13TP2 protein (NS5ATP13TP2), mRNA.                                                                                                                               |
| TF          | -0.60 | transferrin (TF), mRNA.                                                                                                                                                |
| C8G         | -0.60 | complement component 8, gamma polypeptide (C8G), mRNA.                                                                                                                 |
| SLC2A2      | -0.60 | solute carrier family 2 (facilitated glucose transporter), member 2 (SLC2A2), mRNA.                                                                                    |
| PCCB        | -0.60 | propionyl Coenzyme A carboxylase, beta polypeptide (PCCB), mRNA.                                                                                                       |
| ACF         | -0.60 | apobec-1 complementation factor (ACF), transcript variant 1, mRNA.                                                                                                     |
| FLJ14665    | -0.61 | Hypothetical protein FLJ14665                                                                                                                                          |
| PECI        | -0.61 | Peroxisomal D3,D2-enoyl-CoA isomerase                                                                                                                                  |
| SEPP1       | -0.61 | selenoprotein P, plasma, 1 (SEPP1), mRNA.<br>acetyl-Coenzyme A acetyltransferase 1 (acetoacetyl Coenz. A thiolase), nuclear gene encoding mitochondrial protein, mRNA. |
| ACAT1       | -0.61 |                                                                                                                                                                        |
| UGT2B4      | -0.61 | UDP glycosyltransferase 2 family, polypeptide B4 (UGT2B4), mRNA.                                                                                                       |
| INSIG1      | -0.61 | insulin induced gene 1 (INSIG1), transcript variant 3, mRNA.<br>serine (or cysteine) proteinase inhibitor, clade D (heparin cofactor), member 1 (SERPIND1), mRNA.      |
| SERPIND1    | -0.61 |                                                                                                                                                                        |
| UNKL        | -0.62 | Unkempt-like ( <i>Drosophila</i> )                                                                                                                                     |
| SSBP1       | -0.62 | single-stranded DNA binding protein 1 (SSBP1), mRNA.                                                                                                                   |
| ALDH4A1     | -0.62 | Aldehyde dehydrogenase 4 family, member A1                                                                                                                             |
| ACSL1       | -0.62 | acyl-CoA synthetase long-chain family member 1 (ACSL1), mRNA.                                                                                                          |
| CFH         | -0.62 | complement factor H (CFH), mRNA.                                                                                                                                       |
| CAT         | -0.62 | catalase (CAT), mRNA.                                                                                                                                                  |
| CYB5        | -0.62 | cytochrome b-5 (CYB5), mRNA.                                                                                                                                           |
| FH          | -0.62 | fumarate hydratase (FH), nuclear gene encoding mitochondrial protein, mRNA.                                                                                            |
| SERPINC1    | -0.63 | serine (or cysteine) proteinase inhibitor, clade C (antithrombin), member 1 (SERPINC1), mRNA.                                                                          |
| FLJ30679    | -0.64 | Hypothetical protein FLJ30679                                                                                                                                          |
| PCSK6       | -0.64 | proprotein convertase subtilisin/kexin type 6 (PCSK6), transcript variant 2, mRNA.                                                                                     |
| CPB2        | -0.64 | carboxypeptidase B2 (plasma, carboxypeptidase U) (CPB2), transcript variant 2, mRNA.                                                                                   |
| HSD17B4     | -0.64 | hydroxysteroid (17-beta) dehydrogenase 4 (HSD17B4), mRNA.                                                                                                              |
| F13B        | -0.64 | coagulation factor XIII, B polypeptide (F13B), mRNA.                                                                                                                   |
| EPHX1       | -0.64 | epoxide hydrolase 1, microsomal (xenobiotic) (EPHX1), mRNA.                                                                                                            |
| APOH        | -0.65 | apolipoprotein H (beta-2-glycoprotein I) (APOH), mRNA.                                                                                                                 |
| C2          | -0.65 | complement component 2 (C2), mRNA.                                                                                                                                     |
| C4BPB       | -0.66 | complement component 4 binding protein, beta (C4BPB), mRNA.                                                                                                            |
| IQGAP2      | -0.66 | IQ motif containing GTPase activating protein 2 (IQGAP2), mRNA.                                                                                                        |
| CFHL2       | -0.68 | complement factor H-related 2 (CFHL2), mRNA.                                                                                                                           |
| MGC10993    | -0.69 | Hypothetical protein MGC10993                                                                                                                                          |
| KNG1        | -0.69 | kininogen 1 (KNG1), mRNA.                                                                                                                                              |
| MTSS1       | -0.70 | metastasis suppressor 1 (MTSS1), mRNA.                                                                                                                                 |
