# Supplementary material for: Keratin 19: a key role player in the invasion of human hepatocellular carcinomas
Source: HighWire-hosted journal article supplement (doi:10.1136/gutjnl-2012-304351), 2013-08-19
Supplement: gutjnl-2012-304351supp3.pdf [file gutjnl-2012-304351supp3.pdf]

### Supplementary File 3.

Out of 21,329 genes in the arrays, 132 genes correlated positively and 203 genes correlated negatively with *KRT19* expression, using a total of 139 HCC samples. Gene Set Enrichment Analysis, a computational web based analysis method, was used to statistically analyse the overlap with previous published gene expression signatures (see tables below) <sup>1,2</sup>. Additionally, STRING analysis was performed to predict protein interactions, either direct (physical) or indirect (functional) associations (see pictures below) <sup>3</sup>.

**Table. Gene Set Enrichment Analysis of genes positively correlated with *KRT19* (n=132)**

| Gene Set Name [# Genes (K)]                   | Description                                                                                                                                                                                                         | # Genes in Overlap (k) | k/K    | p value  | Source          |
|-----------------------------------------------|---------------------------------------------------------------------------------------------------------------------------------------------------------------------------------------------------------------------|------------------------|--------|----------|-----------------|
| ONDER_CDH1_TARGETS_2_DN                       | Genes down-regulated in HMLE cells (immortalized nontransformed mammary epithelium) after E-cadherin (CDH1) [Gene ID=999] knockdown by RNAi.                                                                        | 25                     | 0.0529 | 0,00E+00 | Pubmed 18483246 |
| DELYS_THYROID_CANCER_UP                       | Genes up-regulated in papillary thyroid carcinoma (PTC) compared to normal tissue.                                                                                                                                  | 24                     | 0.0600 | 0,00E+00 | Pubmed 17621275 |
| WU_CELL_MIGRATION                             | Genes associated with migration rate of 40 human bladder cancer cells.                                                                                                                                              | 18                     | 0.0968 | 0,00E+00 | Pubmed 18724390 |
| LEE_LIVER_CANCER_SURVIVAL_DN                  | Genes highly expressed in hepatocellular carcinoma with poor survival.                                                                                                                                              | 18                     | 0.1452 | 0,00E+00 | Pubmed 15349906 |
| CHIANG_LIVER_CANCER_SUBCLASS_PROLIFERATION_UP | Top 200 marker genes up-regulated in the 'proliferation' subclass of hepatocellular carcinoma (HCC); characterized by increased proliferation, high levels of serum AFP [Gene ID=174], and chromosomal instability. | 14                     | 0.1022 | 3.77E-15 | Pubmed 18701503 |
| SMID_BREAST_CANCER_BASAL_UP                   | Genes up-regulated in basal subtype of breast cancer samples.                                                                                                                                                       | 24                     | 0.0355 | 9.66E-15 | Pubmed 18451135 |
| CHARAFE_BREAST_CANCER_LUMINAL_VS_BASAL_DN     | Genes down-regulated in luminal-like breast cancer cell lines compared to the basal-like ones.                                                                                                                      | 20                     | 0.0439 | 4.39E-14 | Pubmed 16288205 |
| JAEGER_METASTASIS_DN                          | Genes down-regulated in metastases from malignant melanoma compared to the primary tumors.                                                                                                                          | 16                     | 0.0606 | 1.41E-13 | Pubmed 17289871 |
| GRUETZMANN_PANCREATIC_CANCER_UP               | Genes up-regulated in pancreatic ductal adenocarcinoma (PDAC) identified in a meta analysis across four independent studies.                                                                                        | 17                     | 0.0491 | 6.93E-13 | Pubmed 15897887 |
| WOO_LIVER_CANCER_RECURRENCE_UP                | Genes positively correlated with recurrence free survival in patients with hepatitis B-related (HBV) hepatocellular carcinoma (HCC).                                                                                | 11                     | 0.1048 | 2.93E-12 | Pubmed 18381945 |
| HOSHIDA_LIVER_CANCER_SUBCLASS_S1              | Genes from 'subtype S1' signature of hepatocellular carcinoma (HCC): aberrant activation of the WNT signaling pathway.                                                                                              | 14                     | 0.0591 | 7.4E-12  | Pubmed 19723656 |
| MCBRYAN_PUBERTAL_BREAST_4_5WK_UP              | Genes up-regulated during pubertal mammary gland development between week 4 and 5.                                                                                                                                  | 14                     | 0.0502 | 6.55E-11 | Pubmed 17486082 |
| COLDREN_GEFITINIB_RESISTANCE_DN               | Genes down-regulated in NSCLC (non-small cell lung carcinoma) cell lines resistant to gefitinib [PubChem=123631] compared to the sensitive ones.                                                                    | 13                     | 0.0570 | 6.77E-11 | Pubmed 16877703 |

|                                                 |                                                                                                                                                                           |    |        |          |                 |
|-------------------------------------------------|---------------------------------------------------------------------------------------------------------------------------------------------------------------------------|----|--------|----------|-----------------|
| NUYTEN_NIPP1_TARGETS_DN                         | Genes down-regulated in PC3 cells (prostate cancer) after knockdown of NIPP1 [Gene ID=5511] by RNAi.                                                                      | 21 | 0.0270 | 9.56E-11 | Pubmed 17724462 |
| LIU_PROSTATE_CANCER_DN                          | Genes down-regulated in prostate cancer samples.                                                                                                                          | 17 | 0.0357 | 1.07E-10 | Pubmed 16618720 |
| SMID_BREAST_CANCER_LUMINAL_B_DN                 | Genes down-regulated in the luminal B subtype of breast cancer.                                                                                                           | 18 | 0.0301 | 4.63E-10 | Pubmed 18451135 |
| FARMER_BREAST_CANCER_BASAL_VS_LUMINAL           | Genes which best discriminated between two groups of breast cancer according to the status of ESR1 and AR [Gene ID=2099, 367]: basal (ESR1- AR-) and luminal (ESR1+ AR+). | 14 | 0.0418 | 7.21E-10 | Pubmed 15897907 |
| CHARAFE_BREAST_CANCER_BASAL_VS_MESENCHYMAL_UP   | Genes up-regulated in basal-like breast cancer cell lines as compared to the mesenchymal-like ones.                                                                       | 9  | 0.0732 | 7.58E-9  | Pubmed 16288205 |
| VANTVEER_BREAST_CANCER_ESR1_DN                  | Down-regulated genes from the optimal set of 550 markers discriminating breast cancer samples by ESR1 [Gene ID=2099] expression: ER(+) vs ER(-) tumors.                   | 11 | 0.0493 | 9.77E-9  | Pubmed 11823860 |
| CHARAFE_BREAST_CANCER_LUMINAL_VS_MESENCHYMAL_UP | Genes up-regulated in luminal-like breast cancer cell lines compared to the mesenchymal-like ones.                                                                        | 14 | 0.0307 | 3.63E-8  | Pubmed 16288205 |

**Table. Gene Set Enrichment Analysis of genes negatively correlated with *KRT19* (n=203)**

| Gene Set Name [# Genes (K)]                         | Description                                                                                                                                                                                                           | # Genes in Overlap (k) | k/K    | p value  | Source          |
|-----------------------------------------------------|-----------------------------------------------------------------------------------------------------------------------------------------------------------------------------------------------------------------------|------------------------|--------|----------|-----------------|
| FLECHNER_BIOPSY_KIDNEY_TRANSPLANT_REJECTED_VS_OK_DN | Genes differentially expressed in kidney biopsies from patients with acute transplant rejection compared to the biopsies from patients with well functioning kidneys more than 1-year post transplant.                | 40                     | 0.0718 | 0,00E+00 | Pubmed 15307835 |
| CAIRO_LIVER_DEVELOPMENT_DN                          | Genes down-regulated at early fetal liver stage (embryonic days E11.5 - E12.5) compared to the late fetal liver stage (embryonic days E14.5 - E16.5).                                                                 | 41                     | 0.1806 | 0,00E+00 | Pubmed 19061838 |
| LEE_LIVER_CANCER_DENA_DN                            | Genes down-regulated in hepatocellular carcinoma (HCC) induced by diethylnitrosamine (DENA) [PubChem=5921].                                                                                                           | 15                     | 0.2083 | 0,00E+00 | Pubmed 15565109 |
| YAMASHITA_LIVER_CANCER_STEM_CELL_DN                 | Genes down-regulated in hepatocellular carcinoma (HCC) cells with hepatic stem cell properties.                                                                                                                       | 18                     | 0.2400 | 0,00E+00 | Pubmed 19150350 |
| SU_LIVER                                            | Genes up-regulated specifically in human liver tissue.                                                                                                                                                                | 14                     | 0.2414 | 0,00E+00 | Pubmed 11904358 |
| CHIANG_LIVER_CANCER_SUBCLASS_PROLIFERATION_DN       | Top 200 marker genes down-regulated in the 'proliferation' subclass of hepatocellular carcinoma (HCC); characterized by increased proliferation, high levels of serum AFP [Gene ID=174], and chromosomal instability. | 38                     | 0.2452 | 0,00E+00 | Pubmed 18701503 |
| HOSHIDA_LIVER_CANCER_SUBCLASS_S3                    | Genes from 'subtype S3' signature of hepatocellular carcinoma (HCC): hepatocyte differentiation.                                                                                                                      | 66                     | 0.2481 | 0,00E+00 | Pubmed 19723656 |
| WOO_LIVER_CANCER_RECURRENCE_DN                      | Genes negatively correlated with recurrence free survival in patients with hepatitis B-related (HBV) hepatocellular carcinoma (HCC).                                                                                  | 21                     | 0.2625 | 0,00E+00 | Pubmed 18381945 |

|                                          |                                                                                                                                                                                                          |    |        |          |                 |
|------------------------------------------|----------------------------------------------------------------------------------------------------------------------------------------------------------------------------------------------------------|----|--------|----------|-----------------|
| BOYALT_LIVER_CANCER_SUBCLASS_G3_DN       | Down-regulated genes in hepatocellular carcinoma (HCC) subclass G3, defined by unsupervised clustering.                                                                                                  | 16 | 0.3019 | 0,00E+00 | Pubmed 17187432 |
| HSIAO_LIVER_SPECIFIC_GENES               | Liver selective genes                                                                                                                                                                                    | 77 | 0.3020 | 0,00E+00 | Pubmed 11773596 |
| LEE_LIVER_CANCER_SURVIVAL_UP             | Genes highly expressed in hepatocellular carcinoma with good survival.                                                                                                                                   | 59 | 0.4504 | 0,00E+00 | Pubmed 15349906 |
| CAIRO_HEPATOBLASTOMA_DN                  | Genes down-regulated in hepatoblastoma samples compared to normal liver tissue.                                                                                                                          | 23 | 0.0846 | 1.11E-16 | Pubmed 19061838 |
| ACEVEDO_LIVER_CANCER_DN                  | Genes down-regulated in hepatocellular carcinoma (HCC) compared to normal liver samples.                                                                                                                 | 28 | 0.0519 | 7.11E-15 | Pubmed 18413731 |
| LEE_LIVER_CANCER_ACOX1_DN                | Genes down-regulated in hepatocellular carcinoma of ACOX1 [Gene ID=51] knockout mice.                                                                                                                    | 12 | 0.1875 | 1.5E-13  | Pubmed 15565109 |
| CAIRO_HEPATOBLASTOMA_CLASSES_DN          | Genes down-regulated in robust Cluster 2 (rC2) of hepatoblastoma samples compared to those in the robust Cluster 1 (rC1).                                                                                | 17 | 0.0798 | 2.33E-12 | Pubmed 19061838 |
| LEE_LIVER_CANCER_MYC_TGFA_DN             | Genes down-regulated in hepatocellular carcinoma (HCC) tissue of MYC and TGFA [Gene ID=4609, 7039] double transgenic mice.                                                                               | 11 | 0.1774 | 3.03E-12 | Pubmed 15565109 |
| IIZUKA_LIVER_CANCER_PROGRESSION_G2_G3_UP | Genes up-regulated during transition from G2 (moderately differentiated tumor, infected with HCV) to G3 (poorly differentiated tumor, infected with HCV) in the development of hepatocellular carcinoma. | 8  | 0.3810 | 3.33E-12 | Pubmed 15710396 |
| MOOTHA_MITOCHONDRIA                      | Mitochondrial genes                                                                                                                                                                                      | 22 | 0.0484 | 2.8E-11  | Pubmed 12808457 |
| LEE_LIVER_CANCER_E2F1_DN                 | Genes down-regulated in hepatocellular carcinoma (HCC) induced by overexpression of E2F1 [Gene ID=1869].                                                                                                 | 10 | 0.1724 | 4.09E-11 | Pubmed 15565109 |
| GRUETZMANN_PANCREATIC_CANCER_DN          | Genes down-regulated in pancreatic ductal adenocarcinoma (PDAC) identified in a meta analysis across four independent studies.                                                                           | 15 | 0.0765 | 8.7E-11  | Pubmed 15897887 |

**Fig. STRING analysis of genes positively correlated with *KRT19* (n=132)**

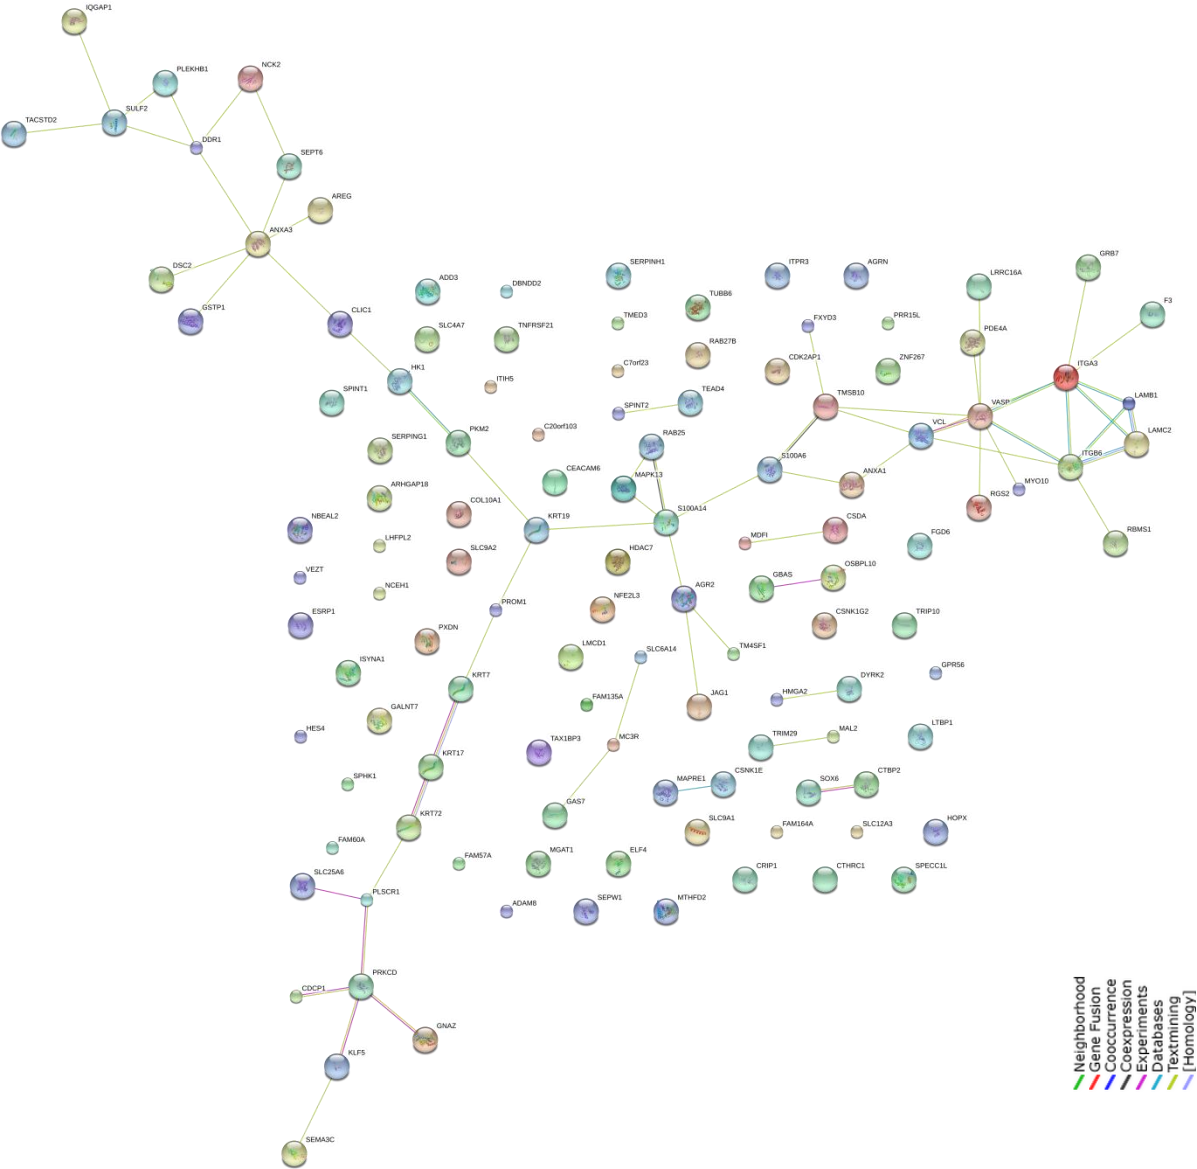

This is the **evidence view**. Different line colors represent the types of evidence for the association.

**Fig. STRING analysis of genes negatively correlated with *KRT19* (n=203)**

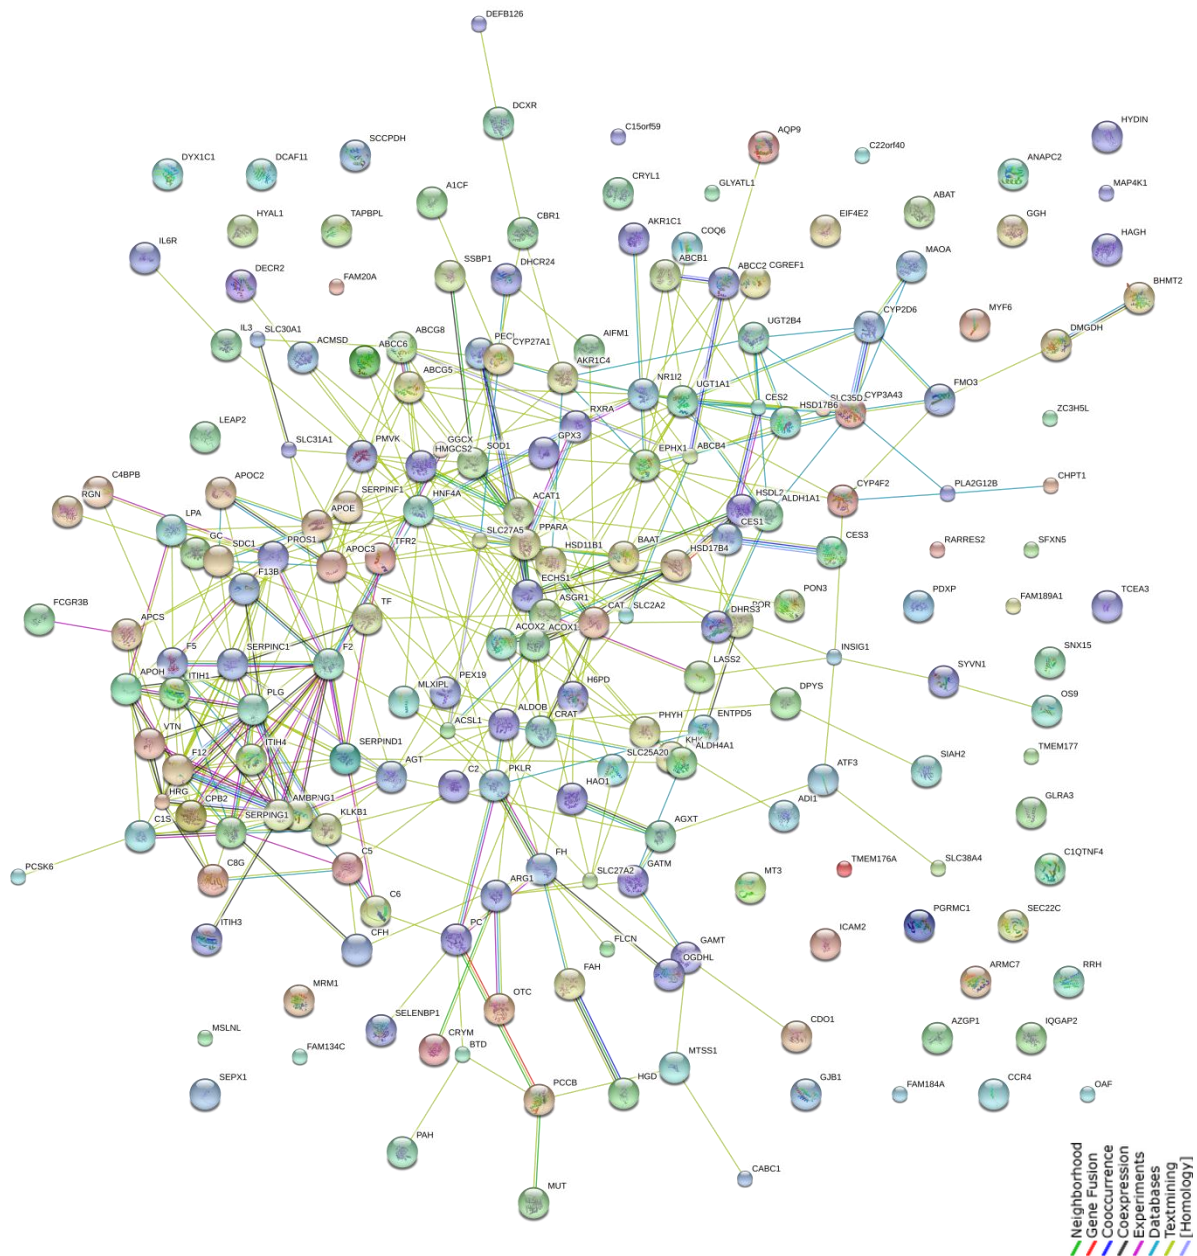

This is the **evidence view**. Different line colors represent the types of evidence for the association.

1. Subramanian, A., *et al.* Gene set enrichment analysis: a knowledge-based approach for interpreting genome-wide expression profiles. *Proc Natl Acad Sci U S A* **102**, 15545-15550 (2005).
2. Mootha, V.K., *et al.* PGC-1alpha-responsive genes involved in oxidative phosphorylation are coordinately downregulated in human diabetes. *Nat Genet* **34**, 267-273 (2003).
3. Szklarczyk, D., *et al.* The STRING database in 2011: functional interaction networks of proteins, globally integrated and scored. *Nucleic Acids Res* **39**, D561-568 (2011).
