# Supplementary material for: Keratin 19: a key role player in the invasion of human hepatocellular carcinomas
Source: HighWire-hosted journal article supplement (doi:10.1136/gutjnl-2012-304351), 2013-08-19
Supplement: gutjnl-2012-304351supp4.pdf [file gutjnl-2012-304351supp4.pdf]

## Supplementary File 4

### Primer sequence overview

Primers were custom made with the software Perlprimer (<http://perlprimer.sourceforge.net/>) or obtained from the RT Primer Database (<http://medgen.ugent.be/rprimerdb/>), and are listed below. For normalization the following reference genes were used: beta-2-microglobulin, glyceraldehyde 3-phosphate dehydrogenase, hypoxanthine phosphoribosyltransferase 1 and ribosomal protein L19. The nonparametric Mann-Whitney test was used for all statistical comparisons. A p-value of less than 0.05 was considered significant.

| Gene Symbol             | Name                                                       | Forward Primer           | Position | Length | Tm    | Reverse Primer          | Position | Length | Tm    | Amplicon Size |
|-------------------------|------------------------------------------------------------|--------------------------|----------|--------|-------|-------------------------|----------|--------|-------|---------------|
| <a href="#">KRT19</a>   | keratin 19                                                 | CTTCCGAACCAAGTTTGAGAC    | 633      | 21     | 61.48 | AGCGTACTGATTCTCCTC      | 815      | 20     | 61.36 | 182           |
| <a href="#">KRT7</a>    | keratin 7                                                  | GGACATCGAGATCGCCACCT     | 1281     | 20     | 60    | ACCGCCACTGCTACTGCCA     | 1386     | 19     | 60    | 124           |
| <a href="#">PROM1</a>   | prominin 1                                                 | TGGATGCAGAACTTGACAACGT   | 1049     | 22     | 60    | ATACCTGCTACGACAGTCGTGGT | 1159     | 23     | 60    | 133           |
| <a href="#">GSTP1</a>   | glutathione S-transferase pi 1                             | TGTCGGTGGGTAAGGAGATAG    | 583      | 22     | 60    | TTGCCCTTAGGAGACTCCAAAC  | 788      | 22     | 60    | 225           |
| <a href="#">HNF4A</a>   | hepatocyte nuclear factor 4, alpha                         | GTACTCTCGAGATTAGCC       | 367      | 20     | 60.20 | CTGTCCTCATAGCTTGACCT    | 528      | 20     | 61.01 | 161           |
| <a href="#">ABCC2</a>   | ATP-binding cassette, sub-family C (CFTR/MRP), member 2    | TACCACAAACTCTATCTTGTAAGC | 318      | 26     | 60    | AGTACAAGGCCAGCTCTATGG   | 377      | 22     | 60    | 81            |
| <a href="#">JAG1</a>    | jagged 1 (Alagille syndrome)                               | AATGGGTGGAAGGAAAGAC      | 2495     | 20     | 60.20 | TGTTTCGGGTATGTTACAG     | 2648     | 20     | 60.05 | 153           |
| <a href="#">JAG2</a>    | jagged 2                                                   | CTGGAGGGTGACTATTACTG     | 1949     | 20     | 58.88 | AGTCGTCATGTTCTCATGG     | 2207     | 20     | 60.05 | 258           |
| <a href="#">NOTCH1</a>  | Notch homolog 1, translocation-associated (Drosophila)     | GTGACTGCTCCTCAACTCAAT    | 4429     | 23     | 60    | CTGTCACAGTGCCGCTCACT    | 4500     | 20     | 60    | 91            |
| <a href="#">NOTCH2</a>  | Notch homolog 2 (Drosophila)                               | GTCTCAGTGGATATAAGTGCTC   | 2465     | 23     | 59.78 | ACCAGATTGTCACAAGTTCCT   | 2582     | 21     | 61.67 | 117           |
| <a href="#">NOTCH3</a>  | Notch homolog 3 (Drosophila)                               | TCTTCCAGATTCTCATCCGA     | 5735     | 20     | 60.05 | CATCCACAGCATTGACATCAG   | 5884     | 21     | 61.69 | 149           |
| <a href="#">S100A6</a>  | S100 calcium binding protein A6                            | CTGCAGGATGCTGAAATTGC     | 455      | 20     | 60    | GGAAGTTCACCTCCTGGTCTT   | 503      | 22     | 60    | 70            |
| <a href="#">CTBP2</a>   | C-terminal binding protein 2                               | CATCAGCGCCTTGTCAGTA      | 1524     | 20     | 60    | TGCCTGGCGGATATCTGTATG   | 1584     | 21     | 60    | 81            |
| <a href="#">FAM57A</a>  | family with sequence similarity 57, member A               | ACTCTTCGAAACTTCCTAAGTC   | 365      | 22     | 59.78 | CTTTAGCTGAATCAGAACCTT   | 550      | 21     | 59.77 | 185           |
| <a href="#">TACSTD2</a> | tumor-associated calcium signal transducer 2               | GTAGCCTCATTTACCATCGT     | 1794     | 20     | 59.55 | TCCTCAAAGACATCCAACTG    | 1895     | 21     | 60.26 | 101           |
| <a href="#">MTSS1</a>   | metastasis suppressor 1                                    | TAGTGTTTAAAGAAAGCAAGATC  | 4156     | 25     | 60    | GAGGGTTCGGTCAGAAATGTG   | 4206     | 21     | 60    | 71            |
| <a href="#">ANXA3</a>   | annexin A3                                                 | GACATTAGTTCGAAACATCTG    | 736      | 22     | 59.40 | TTTCATCTCTTCTGCCATCTG   | 808      | 21     | 60.12 | 72            |
| <a href="#">VASP</a>    | vasodilator-stimulated phosphoprotein                      | GAGAAGAACAGCACACCTT      | 1272     | 19     | 59.83 | GAAGCTCCTGTTTACCC       | 1395     | 18     | 60.23 | 123           |
| <a href="#">RAB25</a>   | RAB25, member RAS oncogene family                          | GACCAATCTACTCTCCGA       | 300      | 19     | 60.06 | CACGATAGTACGCCGAG       | 475      | 17     | 59.19 | 175           |
| <a href="#">RAB27B</a>  | RAB27B, member RAS oncogene family                         | GACCAATCTACTCTCCGA       | 300      | 19     | 60.06 | CACGATAGTACGCCGAG       | 475      | 17     | 59.19 | 175           |
| <a href="#">PDGFRA</a>  | platelet-derived growth factor receptor, alpha polypeptide | GGCATTCTTTGCAATACTGCTTAA | 5518     | 24     | 60    | CATCTGCCGATAGCACAGTGA   | 5586     | 21     | 60    | 89            |
| <a href="#">LAMB1</a>   | laminin, beta 1                                            | TTCCAAGTTGCCAGCCC        | 2916     | 17     | 60.28 | GCCAAGCACCTTTCACAG      | 3033     | 18     | 59.40 | 117           |
| <a href="#">LAMC2</a>   | laminin, gamma 2                                           | GAAACACTAACATCTCGCCTC    | 2526     | 22     | 59.75 | TTCCGCTTCGACTCCT        | 2726     | 17     | 60.37 | 200           |
| <a href="#">IQGAP1</a>  | IQ motif containing GTPase activating protein 1            | GAAAGCCCAGGAAATCCAG      | 1867     | 19     | 60.67 | TCCATACAAGCCAACATCAG    | 2065     | 20     | 60.05 | 198           |
| <a href="#">IQGAP2</a>  | IQ motif containing GTPase activating protein 2            | AGTGGTTAAGAGCGATGGA      | 565      | 19     | 60.60 | GATTTCTCCTCTGTGAAGTC    | 758      | 21     | 60.12 | 193           |
| <a href="#">B2M</a>     | beta-2-microglobulin                                       | ACAGCCCAAGATAGTTAAGTG    | 383      | 21     | 59.77 | ATCTTCAAACCTCCATGATGC   | 443      | 21     | 60.74 | 60            |
| <a href="#">GAPDH</a>   | glyceraldehyde-3-phosphate dehydrogenase                   | CAAGATCATCAGCAATGCCT     | 533      | 20     | 60.78 | CAGGGATGATGTTCTGGAGAG   | 726      | 21     | 61.99 | 193           |
| <a href="#">HPRT1</a>   | hypoxanthine phosphoribosyltransferase 1                   | ATAAGCCAGACTTTGTGGA      | 605      | 20     | 59.23 | CTCAACTTGAACCTCATCTTAGG | 760      | 24     | 60.76 | 155           |
| <a href="#">RPL19</a>   | ribosomal protein L19                                      | ATGAGTATGCTCAGGCTTCAAG   | 62       | 21     | 61.99 | GATCAGCCCATCTTTGATGAG   | 211      | 21     | 60.88 | 149           |

### Method Side Population analysis

Immediately after surgical removal of the tumour (resection samples), part of the tissue was fixed in 6% formalin and embedded in paraffin (FFPE), while the other part was freshly cut in small blocks of 1mm by 1mm to be frozen overnight in Recovery™ Cell Culture Freezing Medium (Invitrogen, Carlsbad, CA, USA) on -80°C and subsequently stored in liquid nitrogen. The histopathological diagnosis of HCC was done according to the World Health Organization criteria and were further subdivided into keratin (K) 19 negative and K19 positive HCCs based on immunohistochemical stainings for K19 (1/25; Dako, Glostrup, Denmark) on the FFPE samples. Frozen samples were thawed at 37°C, washed with Hank's balanced salt solution (Invitrogen, Carlsbad, CA, USA), and dissociated using Liberase Blendzyme 3 (Roche, Basel, Switzerland) at a concentration of 0.8 Wunsch unit/ml during 1,5 hours at 37°C. The samples were filtered using a 70 µm nylon mesh filter (BD Biosciences, Franklin Lakes NJ, USA) and a 15% Percoll/ Hanks' Balanced Salt Solution (100g for 15min). The cells were finally resuspended in Hepatozyme-SFM, containing 1% Penicillin/Streptomycin (Invitrogen) and incubated with 5 µg/ml Hoechst33342 (Sigma-Aldrich, St Louis MO, USA) for exactly 90 min at 37°C under continuous agitation. To assess active efflux and side population phenotype, cells were incubated with the transport blockers verapamil (100 µM; Sigma-Aldrich), 20 minutes prior to the Hoechst33342 incubation. Propidium iodide (2 µg/ml; Sigma-Aldrich) was added to exclude dead cells. The cell suspensions were analysed using a FACSAriaII (BD Biosciences). The SP was visualized after UV excitation on the basis of blue emission through a 424/44 filter and of red emission through a 630/22 filter (Omega Optical, Brattleboro, VT). Within the living cell population (propidium iodide negative), the side and main population (MP) were sorted separately and collected in Hepatozyme-SFM. Part of the sorted cells was fixated in BD CytoRich™ System (BD Biosciences) and processed into cytopins. Immunohistochemistry was performed on the cytopins to assess K19 expression in the sorted samples. Statistical analysis to determine significant differences in the size of the Side Population fraction was performed using the non-parametric Man-Whitney U test, with Graphpad Prism 5.02 (GraphPad Software, Inc., La Jolla, CA, USA). All analysis was two-tailed. In all cases,  $p < 0.05$  was considered significant.
